# Supplementary material
Source: Springer Nature journal article supplement (https://www.springermedizin.de/resource/supplementary/12875_2003_46_MOESM5_ESM.pdf/9436168)
Supplement: MOESM5 [file 9436168]

Additional file 5: Effect of statin according to trial duration. Most frequently used dose in the trials

Atorvastatin 10 mg

| Number of trials | Number of patients |          | Duration           |           | Weighted mean initial [TC]* | Weighted mean change from baseline |         |
|------------------|--------------------|----------|--------------------|-----------|-----------------------------|------------------------------------|---------|
|                  | Randomised         | Analysed | Split for analysis | Actual    |                             | Absolute                           | Percent |
| 4                | 1107               | 1107     | All combined       | 12-52 wks | 7.2                         | -2.0                               | -27     |
| 3                | 975                | 975      | 12-24 wks          | 12-16 wks | 7.1                         | -1.9                               | -27     |
| 1                | 132                | 132      | 25-52 wks          | 52 wks    | 7.6                         | -2.3                               | -30     |

Cerivastatin 0.4 mg

| Number of trials | Number of patients |          | Duration           |           | Weighted mean initial [TC]* | Weighted mean change from baseline |         |
|------------------|--------------------|----------|--------------------|-----------|-----------------------------|------------------------------------|---------|
|                  | Randomised         | Analysed | Split for analysis | Actual    |                             | Absolute                           | Percent |
| 2                | 527                | 527      | All combined       | 24/52 wks | 7.0                         | -1.7                               | -25     |
| 1                | 332                | 332      | 12-24 wks          | 24 wks    | 6.8                         | -1.8                               | -26     |
| 1                | 195                | 195      | 25-52 wks          | 52 wks    | 7.2                         | -1.7                               | -24     |

Fluvastatin 40 mg

| Number of trials | Number of patients |          | Duration           |           | Weighted mean initial [TC]* | Weighted mean change from baseline |         |
|------------------|--------------------|----------|--------------------|-----------|-----------------------------|------------------------------------|---------|
|                  | Randomised         | Analysed | Split for analysis | Actual    |                             | Absolute                           | Percent |
| 5                | 376                | 376      | All combined       | 12-24 wks | 7.6                         | -1.3                               | -17     |
| 3                | 122                | 122      | 12 wks             | 12 wks    | 6.8                         | -1.5                               | -20     |
| 2                | 254                | 254      | 24 wks             | 24 wks    | 7.4                         | -1.3                               | -17     |

Lovastatin 40 mg

| Number of trials | Number of patients |          | Duration           |           | Weighted mean initial [TC]* | Weighted mean change from baseline |         |
|------------------|--------------------|----------|--------------------|-----------|-----------------------------|------------------------------------|---------|
|                  | Randomised         | Analysed | Split for analysis | Actual    |                             | Absolute                           | Percent |
| 4                | 3743               | 3743     | All combined       | 12-48 wks | 6.8                         | -1.5                               | -23     |
| 2                | 387                | 387      | 12-24 wks          | 12-14 wks | 7.8                         | -1.6                               | -21     |
| 2                | 3436               | 3436     | 25-52 wks          | 48 wks    | 6.7                         | -1.5                               | -22     |

Pravastatin 40 mg

| Number of trials | Number of patients |          | Duration           |                | Weighted mean initial [TC]* | Weighted mean change from baseline |         |
|------------------|--------------------|----------|--------------------|----------------|-----------------------------|------------------------------------|---------|
|                  | Randomised         | Analysed | Split for analysis | Actual         |                             | Absolute                           | Percent |
| 17               | 8716               | 6635     | All combined       | 12 wks - 5 yrs | 6.5                         | -1.3                               | -21     |
| 11               | 2293               | 2293     | 12-24 wks          | 12-24wks       | 6.6                         | -1.3                               | -20     |
| 1                | 199                | 199      | 25-52 wks          | 46 wks         | 6.9                         | -1.5                               | -22     |
| 7                | 6674               | 4593     | > 1 yr             | 2-5 yrs        | 6.4                         | -1.3                               | -20     |

Rosuvastatin 5 or 10 mg

| Dose  | Number of trials | Number of patients |          | Duration           |        | Weighted mean initial [TC]* | Weighted mean change from baseline |         |
|-------|------------------|--------------------|----------|--------------------|--------|-----------------------------|------------------------------------|---------|
|       |                  | Randomised         | Analysed | Split for analysis | Actual |                             | Absolute                           | Percent |
| 5 mg  | 4                | 510                | 510      | 12 wks             | 12     | 7.3                         | -2.2                               | -30     |
| 10 mg | 4                | 495                | 495      | 12 wks             | 12     | 7.0                         | -2.3                               | -33     |

No data provided for total cholesterol over 52 weeks

Simvastatin 40 mg

| Number of trials | Number of patients |          | Duration           |                  | Weighted mean initial [TC]* | Weighted mean change from baseline |         |
|------------------|--------------------|----------|--------------------|------------------|-----------------------------|------------------------------------|---------|
|                  | Randomised         | Analysed | Split for analysis | Actual           |                             | Absolute                           | Percent |
| 4                | 10952              | 10952    | All combined       | 24 wks - 3.5 yrs | 5.7                         | -1.5                               | -26     |
| 2                | 477                | 477      | 12-24 wks          | 24 wks           | 8.0                         | -2.4                               | -31     |
| 2                | 10475              | 10475    | > 1 yr             | 3-3.5 yrs        | 5.6                         | -1.5                               | -26     |

Placebo

| Number of trials | Number of patients |          | Duration           |                | Weighted mean initial [TC]* | Weighted mean change from baseline |         |
|------------------|--------------------|----------|--------------------|----------------|-----------------------------|------------------------------------|---------|
|                  | Randomised         | Analysed | Split for analysis | Actual         |                             | Absolute                           | Percent |
| 47               | 25081              | 22617    | All combined       | 12 wks - 5 yrs | 6.2                         | 0.004                              | -0.1    |
| 21               | 2090               | 2090     | 12-24 wks          | 12-24 wks      | 6.6                         | -0.05                              | -0.8    |
| 10               | 2852               | 2852     | 25-52 wks          | 25-52 wks      | 6.6                         | 0.02                               | 0.3     |
| 16               | 20028              | 17564    | 3-5 yrs            | 3-5 yrs        | 6.1                         | 0.01                               | 0.2     |

\* [TC]: mean concentration of total cholesterol, in mmol/L, at baseline
